# Supplementary material
Source: publisher figshare collection journal article supplement (https://gsapubs.figshare.com/ndownloader/files/23318273)
Supplement: Supplementary file 1 [file 23318273]

Supplementary material for:

# Salt tectonics in the Eastern Mediterranean: Where a giant delta meets a salt giant

**Elchanan Zucker<sup>1,2</sup>, Zohar Gvirtzman<sup>1,2</sup>, Josh Steinberg<sup>3</sup>, Yehouda Enzel<sup>1</sup>**

<sup>1</sup> *The Fredy and Nadine Herrmann Institute of Earth Sciences, The Hebrew University of Jerusalem, Jerusalem 91904, Israel*

<sup>2</sup> *Geological Survey of Israel, Yesha'yahu Leibowitz 32, Jerusalem, Israel*

<sup>3</sup> *Ratio Oil Exploration, Tel Aviv, Israel*

## DATA AND METHODS

Previous regional compilations of the Pliocene-Quaternary section in the Mediterranean presented sediment thickness data (Morelli, 1988; Morelli and Val'chuk, 1988; Genesseeux et al., 1998; Nashaat, 1998; Hall et al., 2005; Segev et al., 2006; Macgregor, 2012). For the purpose of this study we compiled a base Pliocene (~top salt) structural map. Our compilation (Figure DR1) is based on published and unpublished seismic and well data. The "International Bathymetric Chart of the Mediterranean" (Genesseeux et al., 1998) is a compilation of the Pliocene-Quaternary sediment "thickness" in two way time (TWT) for the entire Mediterranean Sea, produced by the Intergovernmental Oceanographic Commission. We used this compilation wherever newer data is unavailable. For the Nile deep sea fan (NDSF), the Eratosthenes Seamount, and the Herodotus basin we use various sources that are detailed in table DR1. For Israel's exclusive economic zone we used Steinberg et al. (2011) and Sagy et al. (2015). In

addition, we used local structural and thickness maps and many cross sections, some in TWT and some in length units. All sources used for our compilation are listed in table DR1.

The top salt pressure map is calculated by the equation:  $p = \rho gh$ , where  $p$  is pressure at top salt surface,  $g$  – gravity constant,  $\rho$  - density,  $h$  - layer thickness. Using a density of 2200 kg/m<sup>3</sup> for Pliocene-Quaternary layer and 1030 kg/m<sup>3</sup> for seawater layer, we added the effect of the two layers. The result expresses the vertical present-day pressure (MPa) applied on the top of the salt layer highlighting areas with pressure gradients.

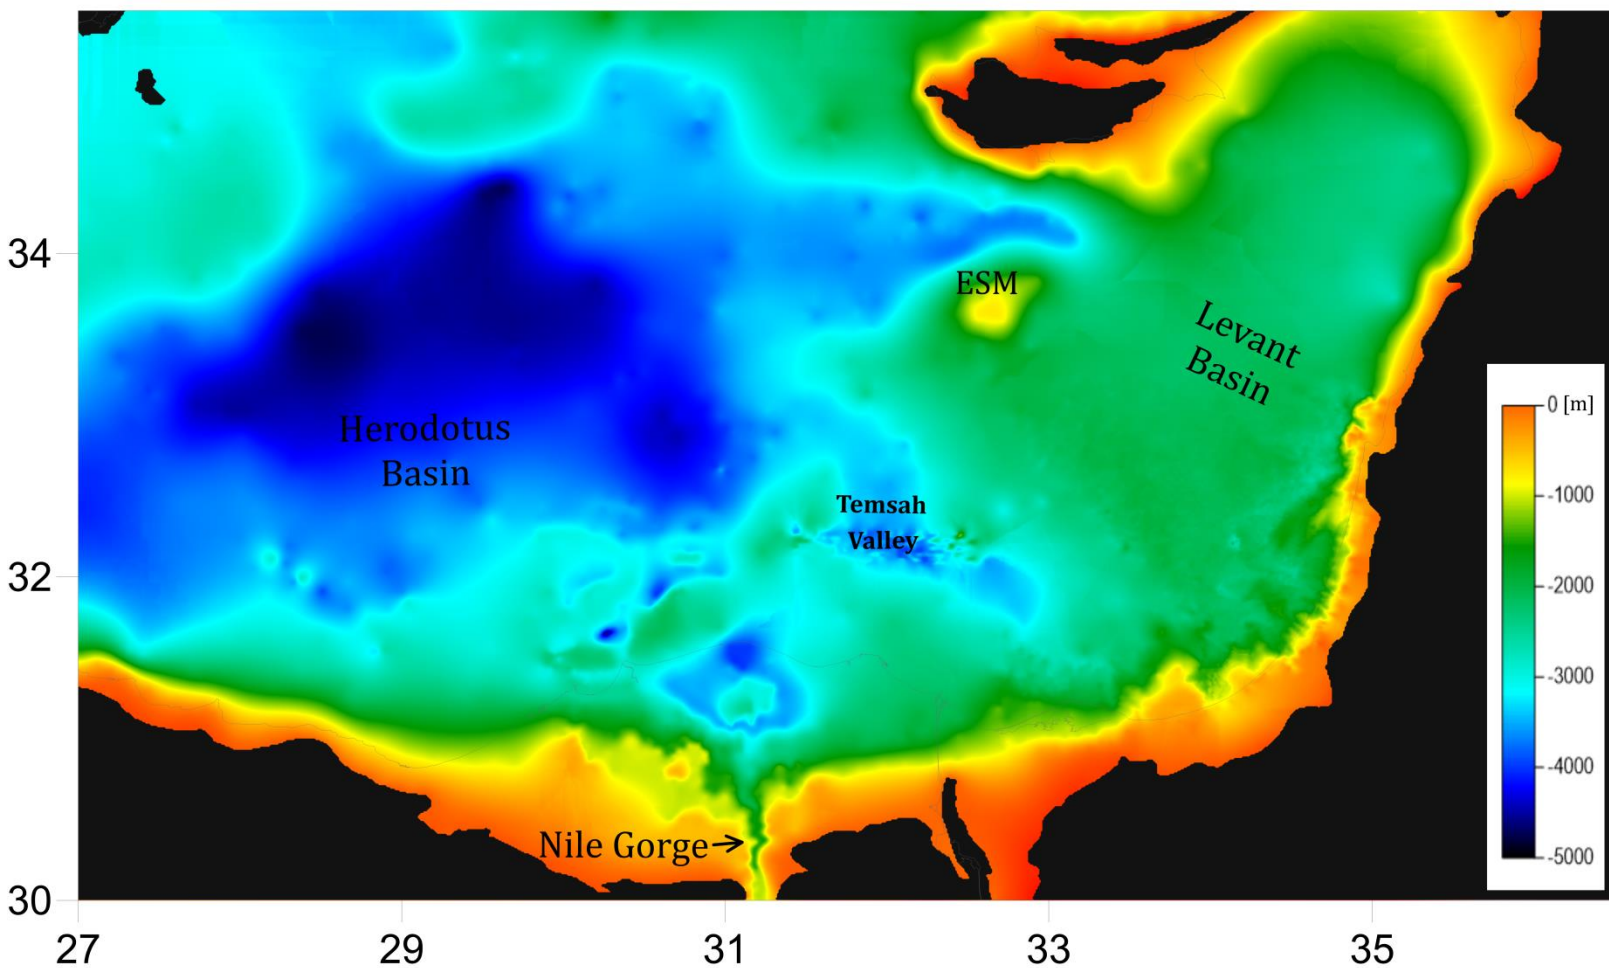

Figure DR1: Base Pliocene (~top Messinian Evaporites) structural map. Black area denotes no Pliocene-Quaternary section. Present-day coastline (gray) is shown for reference.

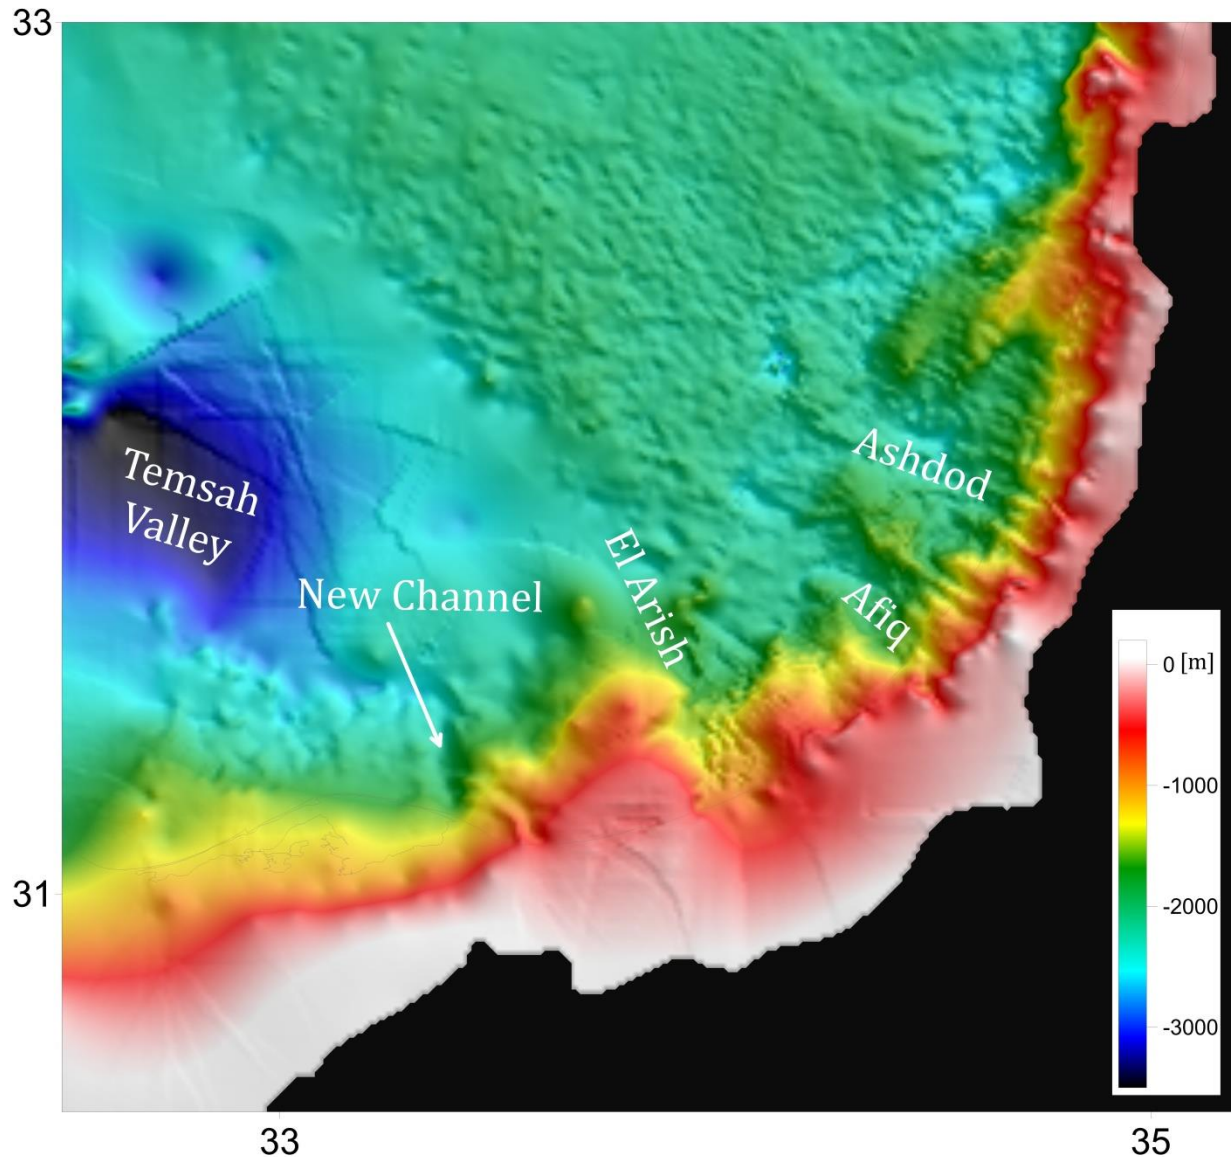

Figure DR2: Base Pliocene structural map showing in detail the steep incised relief left after the Messinian Salinity Crisis offshore Israel and Sinai. Most canyons incised across the continental margin were previously described in the literature (e.g., Druckman et al., 1995; Bar et al., 2013, 2016). However the canyon west of the El Arish Canyon (white arrow) is presented here for the first time (New Channel). This canyon indicates that the Tamsah Valley already existed by the end of salt deposition.

| TABLE DR1. DATA SOURCES FOR BASE PLIOCENE MAP |                                                                                                                  |                                  |                                                   |                    |
|-----------------------------------------------|------------------------------------------------------------------------------------------------------------------|----------------------------------|---------------------------------------------------|--------------------|
| #                                             | Source                                                                                                           | Depth or Thickness               | Sysmic data map / Cross section / Drill hole data | Units              |
| 1                                             | Abd-Allah et al., 2012                                                                                           | Depth to Top Salt                | Seismic cross section + map                       | TWT [sec]          |
| 2                                             | Barber, 1981                                                                                                     | Depth to Top Salt                | Seismic map                                       | meters             |
| 3                                             | Base Pliocene of the Israeli Exclusive Economic Zone (Sources from steinberg et al., 2011 and Sagy et al., 2015) | Depth to Top Salt & PQ Thickness | Seismic cross section + map                       | TWT [sec] & meters |
| 4                                             | Came'ra et al., 2010                                                                                             | Depth to Top Salt                | Seismic cross section                             | meters             |
| 5                                             | Carton et al., 2009                                                                                              | Depth to Top Salt & PQ Thickness | Seismic cross section + map                       | TWT [sec] & [msec] |
| 6                                             | Ducassou et al., 2007                                                                                            | Depth to Top Salt                | Drill hole data                                   | meters             |
| 7                                             | Ducassou et al., 2009                                                                                            | Depth to Top Salt                | Drill hole data                                   | meters             |
| 8                                             | Garziglia et al., 2008                                                                                           | Depth to Top Salt                | Seismic cross section                             | TWT [sec]          |
| 9                                             | Gaullier et al., 2000                                                                                            | Depth to Top Salt                | Seismic cross section                             | TWT [sec]          |
| 10                                            | Gennesseaux et al., 1998                                                                                         | PQ Thickness                     | Seismic map                                       | TWT [msec]         |
| 11                                            | Hanafy et al., 2016                                                                                              | PQ Thickness                     | Seismic map                                       | meters             |
| 12                                            | Kellner et al., 2009                                                                                             | Depth to Top Salt                | Seismic map                                       | TWT [sec]          |
| 13                                            | Loncke et al., 2002; 2006                                                                                        | Depth to Top Salt & PQ Thickness | Seismic cross section + map                       | TWT [sec] & meters |
| 14                                            | MIDBAR                                                                                                           | Depth to Top Salt                | Seismic map                                       | TWT [msec]         |
| 15                                            | Sarhan et al., 2014                                                                                              | Depth to Top Salt                | Seismic cross section                             | TWT [sec]          |
| 16                                            | Shaaban et al., 2006                                                                                             | Depth to Top Salt                | Seismic map & Drill hole data                     | meters             |

Table DR1: Data sources for the compiled base Pliocene structural map (Figure DR1). Location of each source number can be found in the source location map (Figure DR3).

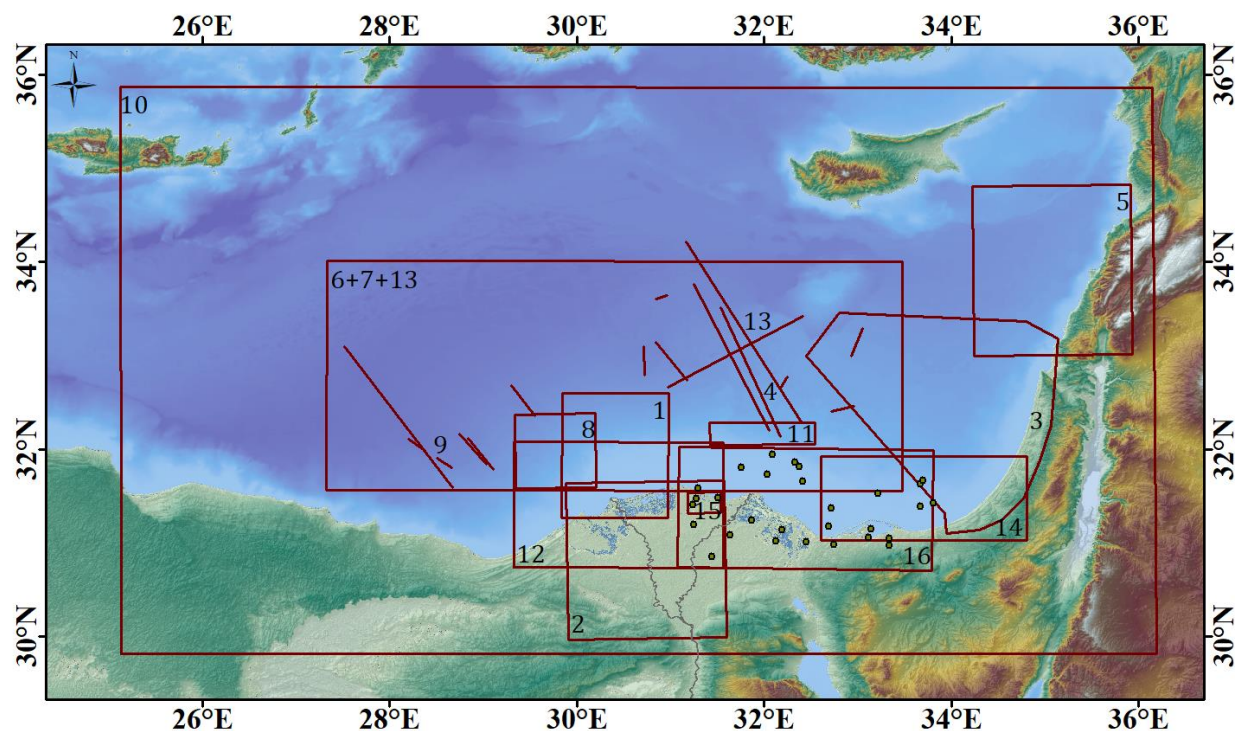

Figure DR3: Location of studies used for compilation. Numbers correspond to Table DR1.

## **Salt migration**

To reconstruct the original boundary of the salt basin prior to its basinward flow, we examine salt rollers, welds, and normal faults. These structures are formed as response to salt withdrawal (Rowan et al., 1999; Wagner and Jackson, 2011; Allen et al., 2016) and thus mark the salt evacuation zone (SEZ, Fig. 1c). Figure DR4 (modified after Allen et al., 2016) demonstrates that the width of the SEZ is <30 km. We, therefore, conclude that the difference between the present-day salt pinch-out line and the original boundary of the salt wedge is quite narrow in terms of the PQ depocenter, which was originally deposited landward of the thick (>150 m) salt layer.



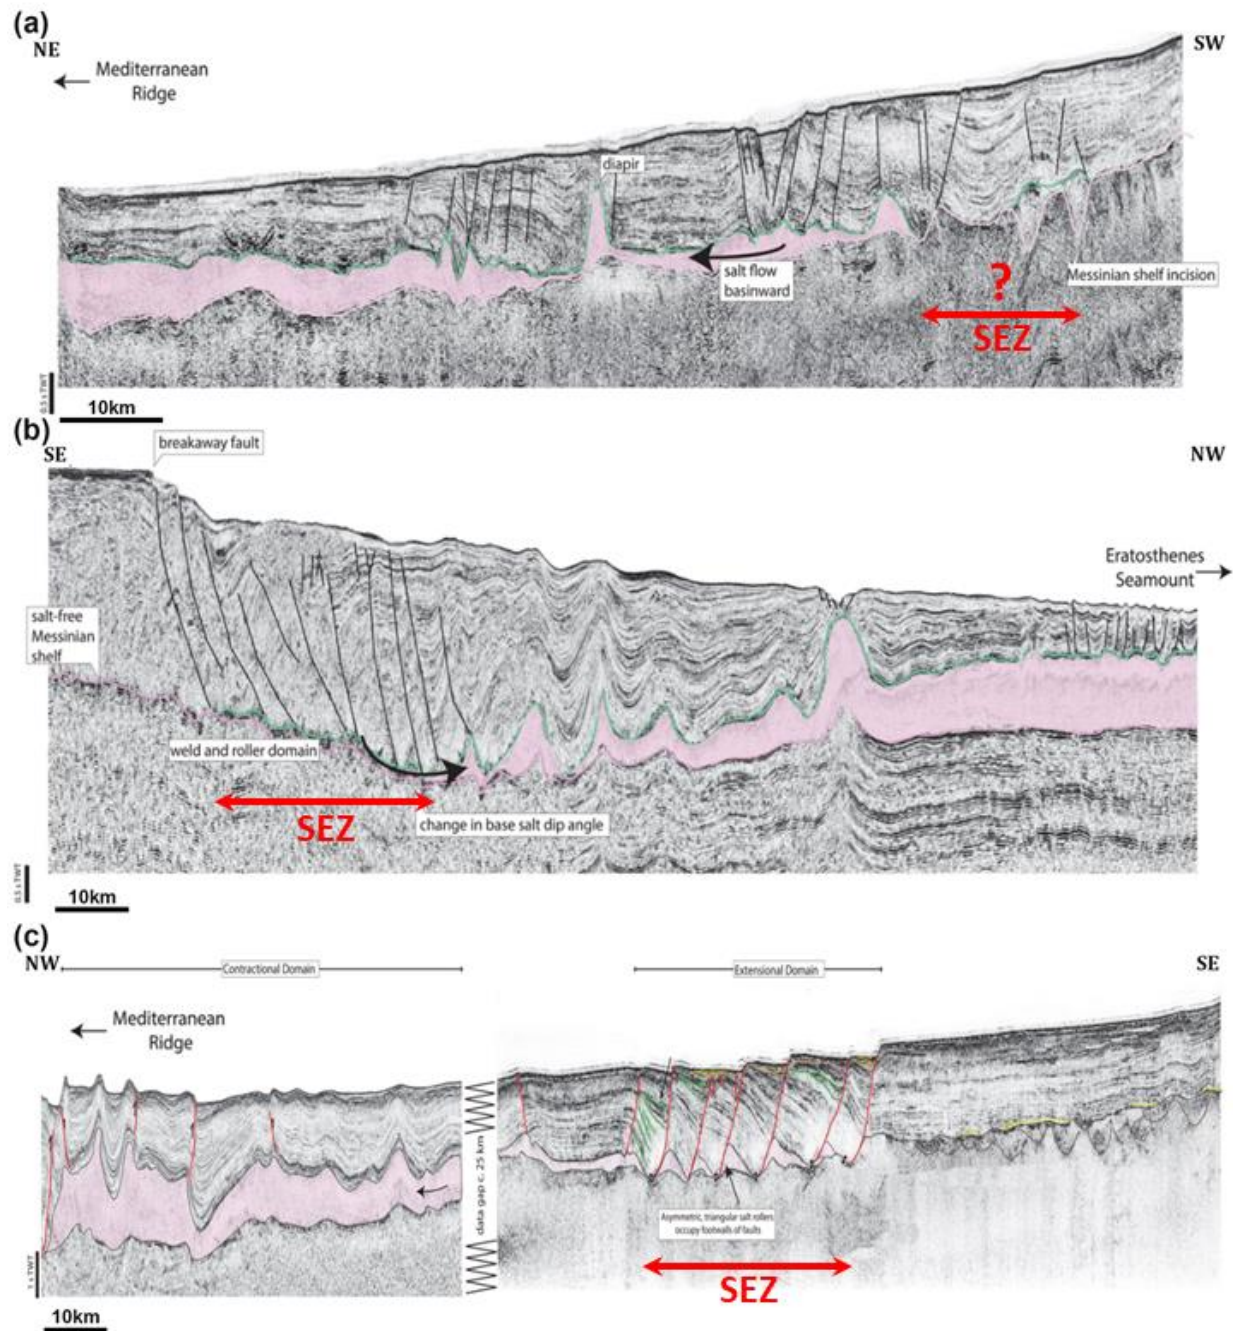

Figure DR4: Seismic cross sections (modified after Allen et al., 2016) showing the distribution of salt rollers, welds, and normal faults. The area marked by a red arrow indicates the salt evacuation zone (SEZ), which is narrower than 30 km. Section's location in Fig. 1c.

## REFERENCES

- Allen, H., Jackson, C.A.-L., and Fraser, A.J., 2016, Gravity-driven deformation of a youthful saline giant: the interplay between gliding and spreading in the Messinian basins of the Eastern Mediterranean: *Petroleum Geoscience*, v. 22, p. 340–356, doi:10.1144/petgeo2016-034.
- Bar, O., Gvirtzman, Z., Feinstein, S., and Zilberman, E., 2013, Accelerated subsidence and sedimentation in the levant basin during the late tertiary and concurrent uplift of the arabian platform: Tectonic versus counteracting sedimentary loading effects: *Tectonics*, v. 32, p. 334–350, doi:10.1002/tect.20026.
- Bar, O., Zilberman, E., Feinstein, S., Calvo, R., and Gvirtzman, Z., 2016, The uplift history of the Arabian Plateau as inferred from geomorphologic analysis of its northwestern edge: *Tectonophysics*, v. 671, p. 9–23, doi:10.1016/j.tecto.2016.01.004.
- Druckman, Y., Buchbinder, B., Martinotti, G.M., Siman Tov, R., and Aharon, P., 1995, The buried Afik Canyon (eastern Mediterranean, Israel): a case study of a Tertiary submarine canyon exposed in Late Messinian times: *Marine Geology*, v. 123, p. 167–185, doi:10.1016/0025-3227(94)00127-7.
- Genesseeux, M., Burollet, P., and Winnock, E., 1998, Thickness of the Plio-Quaternary sediments (IBCM-PQ): *Boll. Geofis. Teor. Appl.*, v. 39, p. 243–284.
- Hall, J.K., Krashennnikov, V.A., Hirsch, F., Benjamini, C., and Flexer, A., 2005, Geological framework of the Levant. Volume II: the Levantine Basin and Israel: Jerusalem, 826 p.
- Macgregor, D.S., 2012, The development of the Nile drainage system: integration of onshore and

- offshore evidence: *Petroleum Geoscience*, v. 18, p. 417–431, doi:10.1144/petgeo2011-074.
- Morelli, C., 1988, International bathymetric chart of the Mediterranean (IBCM) published by the Intergovernmental Oceanographic Commission of UNESCO: *AAPG Bulletin*, v. 72.
- Morelli, C., and Val'chuk, S., 1988, The international bathymetric chart of the Mediterranean (IBCM): published under the authority of the Intergovernmental Oceanographic Commission of Unesco:
- Nashaat, M., 1998, Abnormally high Formation pressure and seal impacts on hydrocarbon accumulations in the Nile Delta and North Sinai Basins, Egypt: *AAPG Memoir*, v. 70, p. 161–180.
- Rowan, M.G., Jackson, M.P.A., and Trudgill, B.D., 1999, Salt-related fault families and fault welds in the northern Gulf of Mexico: *AAPG Bulletin*, v. 83, p. 1454–1484.
- Sagy, Y., Gvirtzman, Z., Reshef, M., and Makovsky, Y., 2015, The enigma of the Jonah high in the middle of the Levant basin and its significance to the history of rifting: *Tectonophysics*, v. 665, p. 186–198, doi:10.1016/j.tecto.2015.09.037.
- Segev, A., Rybakov, M., Lyakhovsky, V., Hofstetter, A., Tibor, G., Goldshmidt, V., and Ben Avraham, Z., 2006, The structure, isostasy and gravity field of the Levant continental margin and the southeast Mediterranean area: *Tectonophysics*, v. 425, p. 137–157, doi:10.1016/J.TECTO.2006.07.010.
- Steinberg, J., Gvirtzman, Z., Folkman, Y., and Garfunkel, Z., 2011, Origin and nature of the rapid late Tertiary filling of the Levant Basin: *Geology*, v. 39, p. 355–358, doi:10.1130/G31615.1.
- Wagner, B.H., and Jackson, M.P.A., 2011, Viscous flow during salt welding: *Tectonophysics*, v. 510, p. 309–326, doi:10.1016/J.TECTO.2011.07.012.
